# Supplementary material for: Quantum Hash function and its application to privacy amplification in quantum key distribution, pseudo-random number generation and image encryption
Source: PubMed Central journal article supplement (PMC4731770; doi:10.1038/srep19788), 2016-01-29
Supplement: srep19788-s1.pdf [file srep19788-s1.pdf]

# Supplemental materials

Quantum Hash function and its application to privacy  
amplification in quantum key distribution, pseudo-random  
number generation and image encryption

Yu-Guang Yang, Peng Xu, Rui Yang, Yi-Hua Zhou, Wei-Min Shi

The message can be randomly chosen as follows:

“0 0 1 1 0 0 0 0 0 0 1 0 1 1 1 1 0 1  
0 1 1 0 0 0 1 1 0 1 1 0 1 0 1 0 0 0  
1 0 1 0 0 0 1 0 0 0 1 0 1 0 1 0 1 0 0  
0 1 1 1 0 1 1 1 1 1 0 1 0 0 1 0 0 1 1  
0 1 0 1 1 0 1 1 1 1 0 0 0 1 1 0 1 1 1  
1 1 1 1 0 0 0 0 0 0 0 1 1 1 1 1 0 0 1  
0 1 1 1 0 0 1 1 1 0 0 1 0 0 1 0 0 1 0  
1 0 1 1 0 0 0 0 0 0 1 0 1 0 1 0 1 1 0  
0 1 1 0 1 0 1 1 0 1 1 1 1 1 0 0 0 1 1  
1 0 1 0 0 0 1 0 0 0 0 0 1 1 1 1 1 1 1  
1 0 1 1 1 1 0 1 0 0 1 1 1 1 1 0 1 0 1  
1 1 1 1 1 1 1 1 0 0 1 0 1 0 1 1 0 1 0  
0 0 0 0 0 0 0 0 1 0 1 1 0 1 0 0 0 1 1  
0 0 1 1 0 0 1 0 0 0 0 1 1 0 1 1 1 0 1  
1 1 1 1 1 0 0 0 0 1 0 0 0 0 1 0 1 1 1  
0 0 0 0 1 0 1 0 1 1 1 1 0 0 0 1 1 0 0  
0 0 1 0 0 0 1 1 0 1 0 1 1 1 0 1 0 0 0  
1 0 0 0 0 0 1 0 0 0 0 0 1 0 0 0 0 0 1  
1 1 0 0 1 1 1 0 1 0 0 1 0 0 1 1 1 1 1  
1 0 1 1 0 0 1 0 1 1 0 0 1 0 1 1 1 0 0  
0 1 1 1 0 1 0 0 1 0 1 1 1 1 0 1 1 1 0  
0”

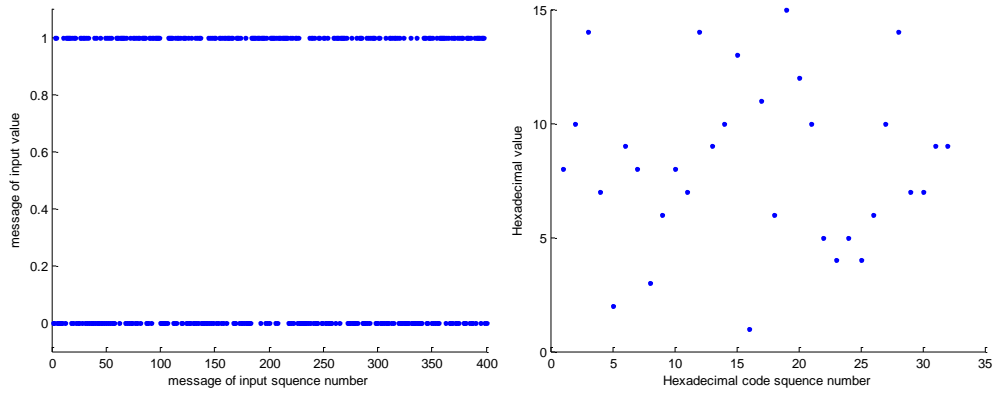

**Supplementary Figure S1** | (a) Distribution of the original message in ASCII. (b) Distribution of the hash value in hexadecimal format.

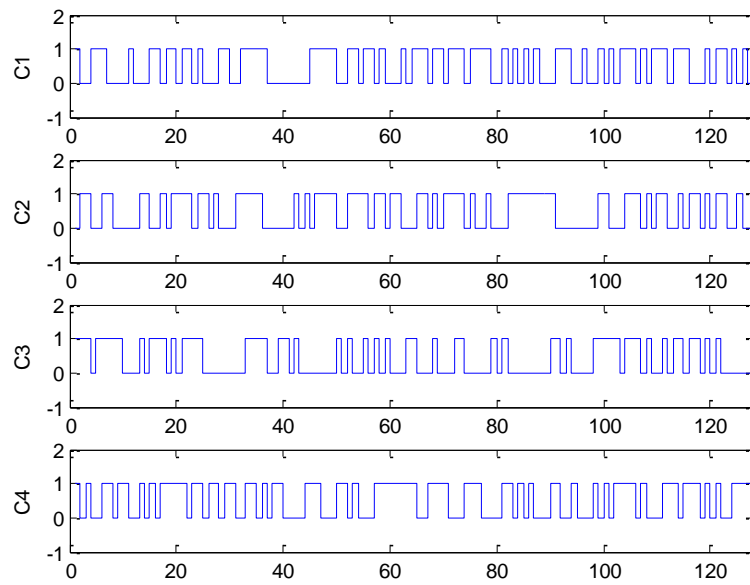

**Supplementary Figure S2** | Plots of the 128-bit hash value C1, C2, C3 and C4

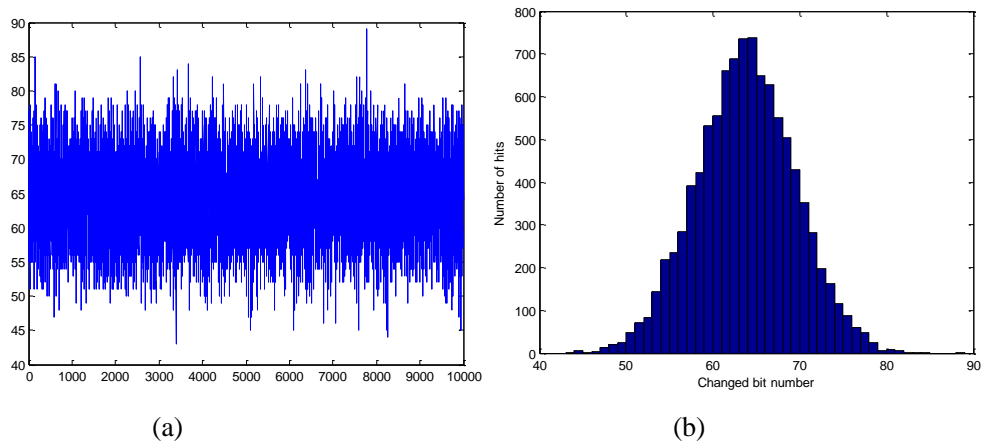

**Supplementary Figure S3** | Distribution of the number of the changed bits. (a) plot of  $B_i$ . (b) histogram of  $B_i$ .

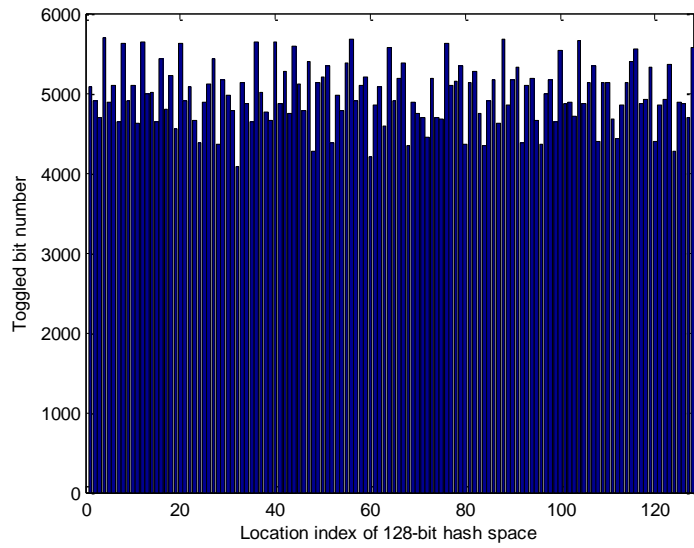

**Supplementary Figure S4** Distribution of the hash value in hash space. The mean, maximum and minimum of toggled bit number are 4973.5, 5689 and 4072 respectively for  $N = 10,000$ .

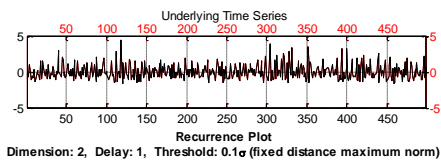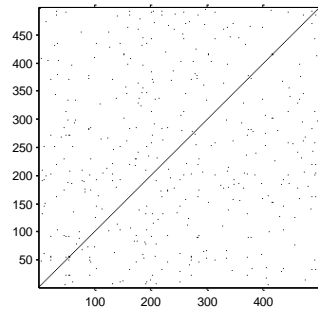

message = 50

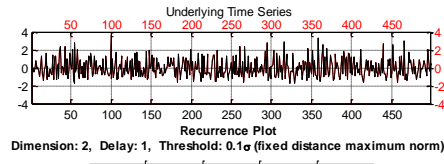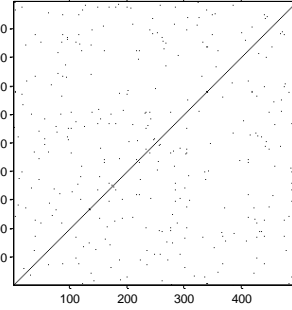

message = 60

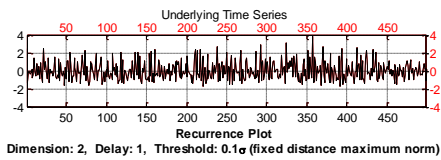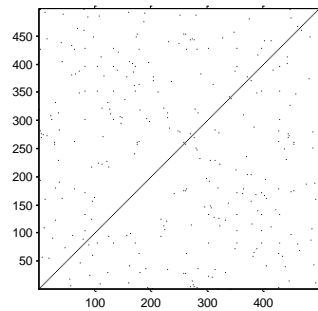

message = 70

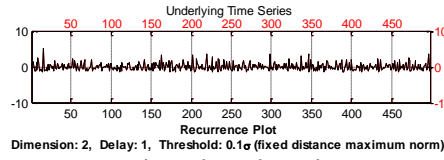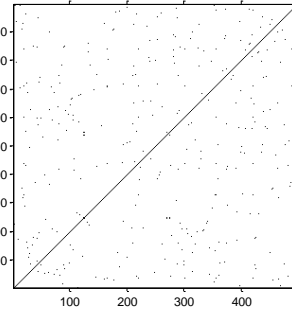

message = 80

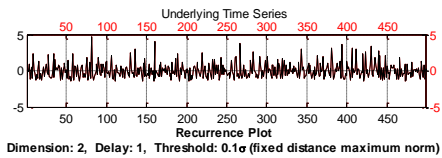

message = 90

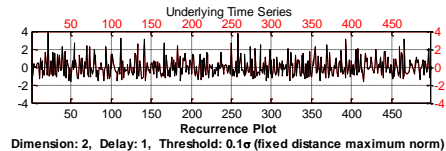

message = 100

**Supplementary Figure S5** | RPs for various values of the control parameter *message*: (a) *message* = 50, (b) *message* = 60, (c) *message* = 70, (d) *message* = 80, (e) *message* = 90, (f) *message* = 100; with the embedding dimension  $m = 2$ , time delay  $\tau = 1$ , threshold  $\varepsilon = 0.1\sigma$ , and  $L_\infty$ -norm.

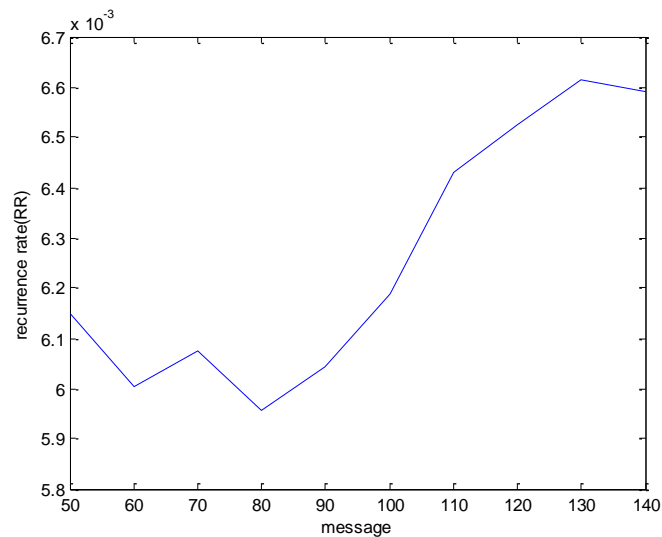

**Supplementary Figure S6** | RRs with different *messages*.

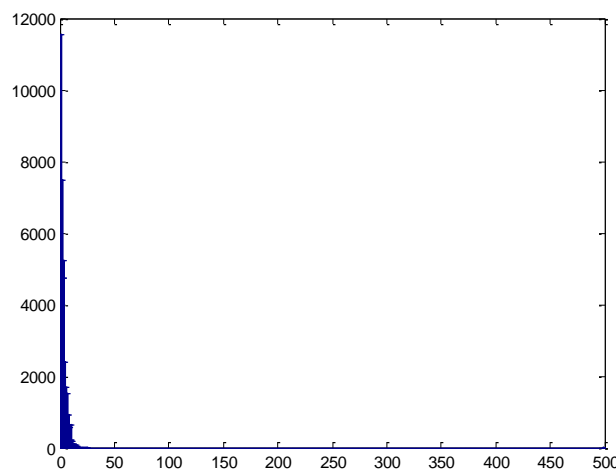

**Supplementary Figure S7** | The histogram of the diagonal line lengths.

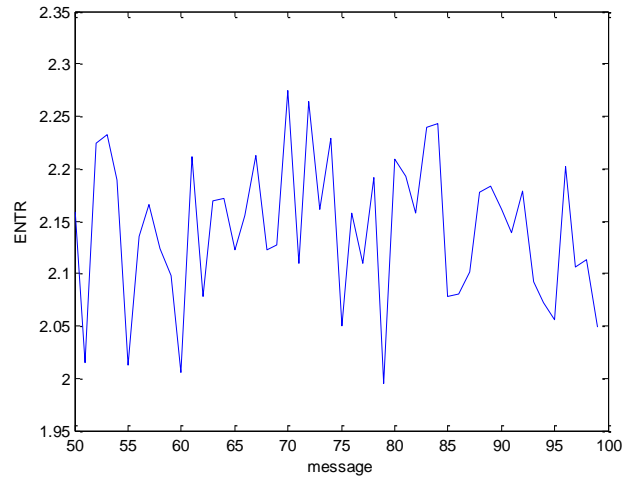

**Supplementary Figure S8** | The measure entropy *ENTR*.

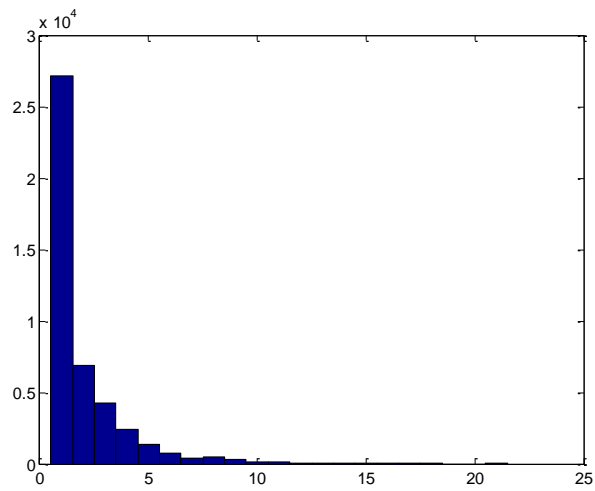

**Supplementary Figure S9** | The histogram of the vertical line lengths.

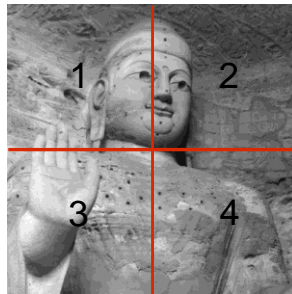

**Supplementary Figure S10** | the sketch of the original image divided into four parts

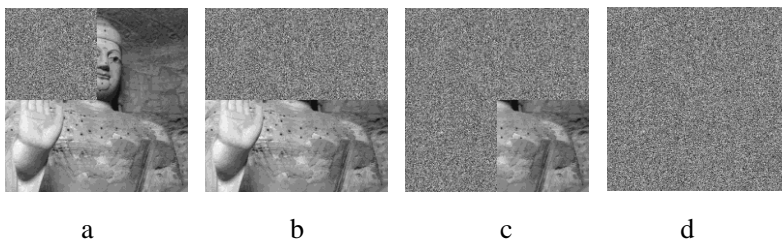

**Supplementary Figure S11** | The first round of the image encryption process. a) Encrypt block 1 with the original image block 4 as the secret key, b) Encrypt block 2 with the encrypted image block 1 as the

secret key, c) Encrypt block 3 with the encrypted image block 2 as the secret key, d) Encrypt block 4 with the encrypted image block 3 as the secret key.

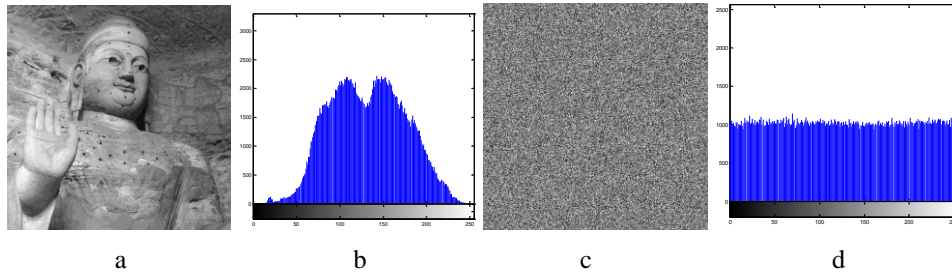

**Supplementary Figure S12** (a) Buddha image (b) Histograms of Buddha image (c) cipher image (d) Histograms of cipher image. We acknowledge Yu-Guang Yang who took the paragraph in (a).

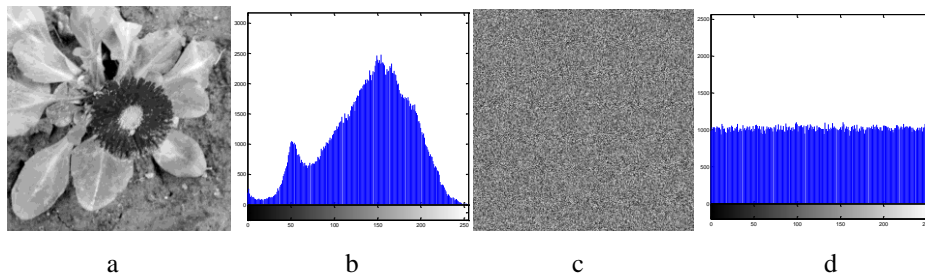

**Supplementary Figure S13** (a) Flower image (b) Histograms of Flower image (c) cipher image (d) Histograms of cipher image. We acknowledge Yu-Guang Yang who took the paragraph in (a).

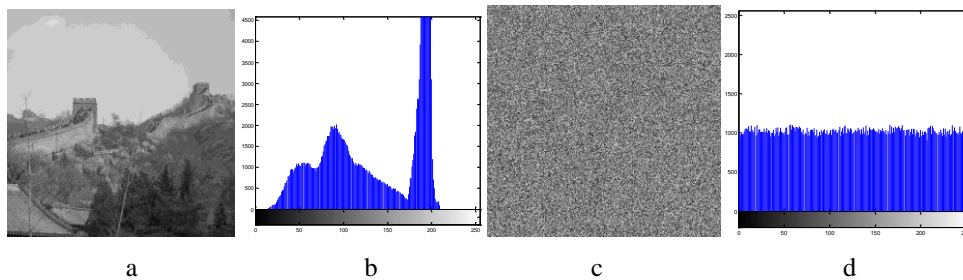

**Supplementary Figure S14** (a) GreatWall image (b) Histograms of GreatWall image (c) cipher image (d) Histograms of cipher image. We acknowledge Yu-Guang Yang who took the paragraph in (a).

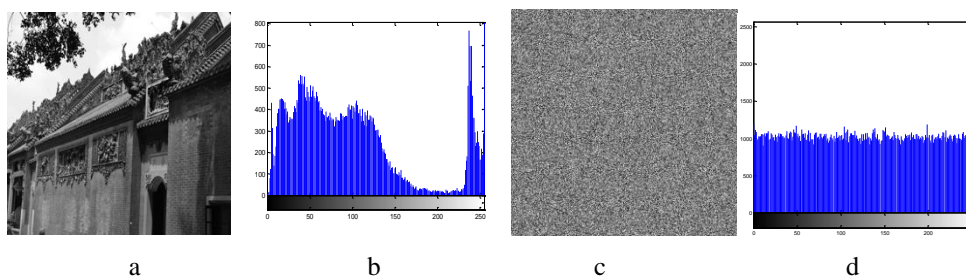

**Supplementary Figure S15** (a) House image (b) Histograms of House image (c) cipher image (d) Histograms of cipher image. We acknowledge Yu-Guang Yang who took the paragraph in (a).

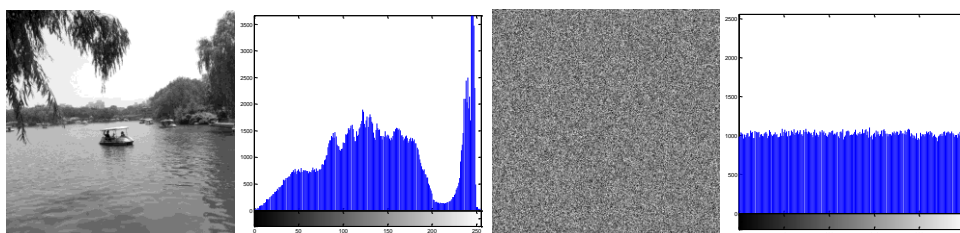

**Supplementary Figure S16** | (a) Lake1 image (b) Histograms of Lake1 image (c) cipher image (d) Histograms of cipher image. We acknowledge Yu-Guang Yang who took the paragraph in (a).

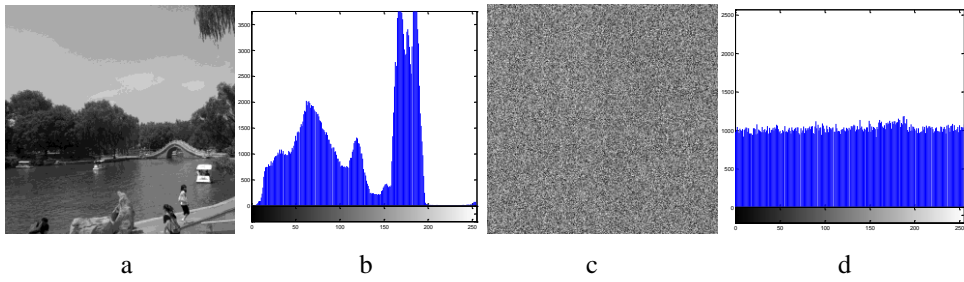

**Supplementary Figure S17** | (a) Lake2 image (b) Histograms of Lake2 image (c) cipher image (d) Histograms of cipher image. We acknowledge Yu-Guang Yang who took the paragraph in (a).

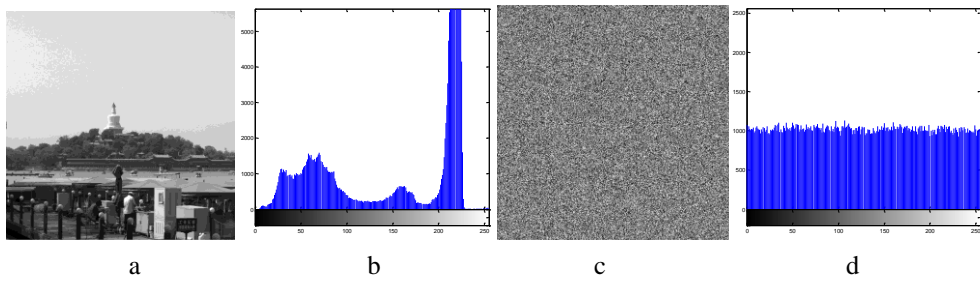

**Supplementary Figure S18** | (a) WhiteTower image (b) Histograms of WhiteTower image (c) cipher image (d) Histograms of cipher image. We acknowledge Yu-Guang Yang who took the paragraph in (a).

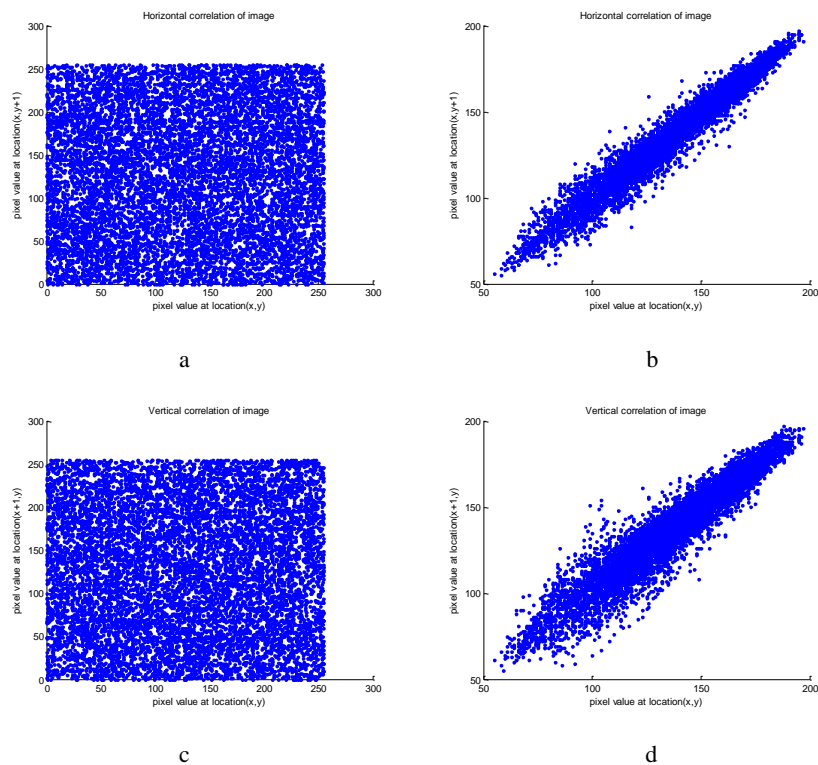

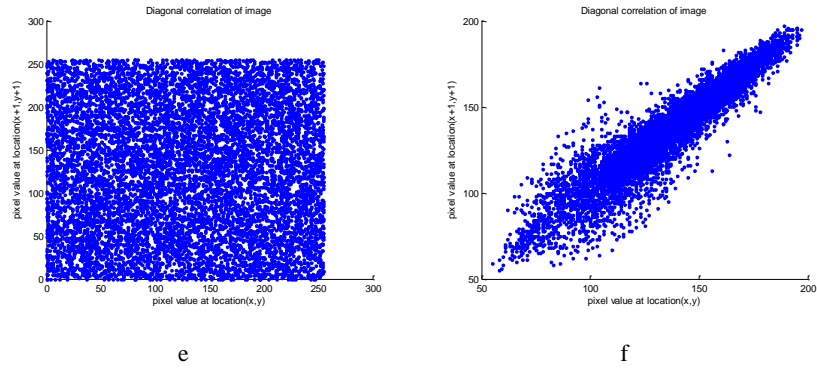

**Supplementary Figure S19** Correlation analyses. (a), (c) and (e) show the distribution of the horizontally, vertically and diagonally adjacent pixels in the Buddha image, respectively. (b), (d) and (f) show the distribution of the horizontally, vertically and diagonally adjacent pixels in the encrypted image, respectively.

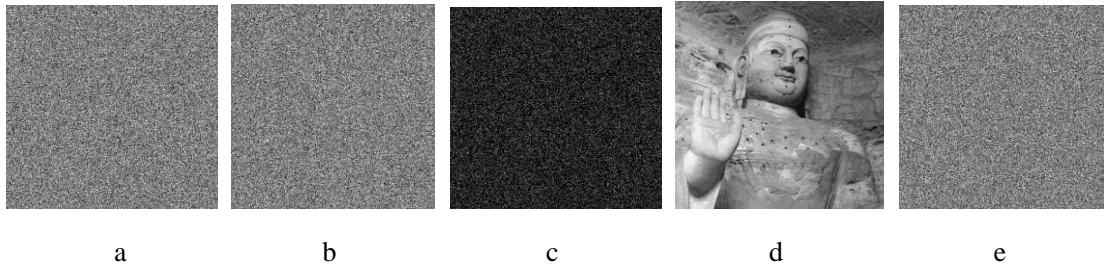

**Supplementary Figure S20** Key sensitivity tests. (a) Cipher image. (b) Cipher image with a little difference from encryption key. (c) Differential image between (a) and (b). (d) Decrypted image of (a) with the correct key; (e) Decrypted image of (a) with a little difference from the decryption key. We acknowledge Yu-Guang Yang who took the Buddha image in Supplementary Fig.S12(a) online and all figures in Supplementary Figure S20 online were obtained by simulations using Matlab software by Peng Xu.

**Supplementary Table S1** Maximum, minimum and mean of the absolute difference of two hash values.

| Absolute difference $d$ | Minimum | Maximum | Mean   |
|-------------------------|---------|---------|--------|
| File                    | 505     | 2231    | 1395.3 |

**Supplementary Table S2** Comparison of correlation coefficients of the plain-images and the corresponding cipher-images encrypted by our algorithm

| Algorithm<br>Images | Original image         |                      |                      | Our algorithm          |                      |                      |
|---------------------|------------------------|----------------------|----------------------|------------------------|----------------------|----------------------|
|                     | Horizontal correlation | Vertical correlation | Diagonal correlation | Horizontal correlation | Vertical correlation | Diagonal correlation |
| Buddha              | 0.8665                 | 0.7586               | 0.7261               | -0.0004                | 0.0009               | 0.0006               |
| Flower              | 0.9719                 | 0.9850               | 0.9593               | 0.0015                 | -0.00009             | -0.00001             |
| GreatWall           | -0.9792                | -0.9826              | 0.9680               | -0.0016                | -0.00008             | 0.0007               |
| House               | 0.8597                 | 0.9591               | 0.8418               | -0.0004                | 0.0007               | -0.0035              |
| Lake1               | 0.9834                 | 0.9903               | 0.9737               | 0.0018                 | 0.0020               | 0.0013               |



|                |               |               |               |               |               |               |
|----------------|---------------|---------------|---------------|---------------|---------------|---------------|
| Lake2          | 0.9890        | 0.9912        | 0.9802        | 0.0015        | 0.0006        | 0.0021        |
| WhiteTower     | 0.9714        | 0.9745        | 0.9532        | -0.0001       | 0.0041        | 0.0053        |
| <b>Average</b> | <b>0.9458</b> | <b>0.9160</b> | <b>0.9146</b> | <b>0.0010</b> | <b>0.0012</b> | <b>0.0023</b> |

**Supplementary Table S3**] Comparison of correlation coefficients between our algorithm and the Chaos-based algorithm[41]

| Algorithm<br>Images | Our algorithm          |                      |                      | Chaos-based algorithm  |                      |                      |
|---------------------|------------------------|----------------------|----------------------|------------------------|----------------------|----------------------|
|                     | Horizontal correlation | Vertical correlation | Diagonal correlation | Horizontal correlation | Vertical correlation | Diagonal correlation |
| Buddha              | -0.0004                | 0.0009               | 0.0006               | -0.0186                | -0.0023              | 0.0041               |
| Flower              | 0.0015                 | -0.00009             | -0.00001             | -0.0078                | -0.0009              | 0.0011               |
| GreatWall           | -0.0016                | -0.00008             | 0.0007               | -0.0471                | -0.0326              | 0.0659               |
| House               | -0.0004                | 0.0007               | -0.0035              | -0.0541                | -0.0248              | 0.0569               |
| Lake1               | 0.0018                 | 0.0020               | 0.0013               | -0.0468                | -0.0166              | 0.0266               |
| Lake2               | 0.0015                 | 0.0006               | 0.0021               | -0.1271                | -0.0906              | 0.1852               |
| WhiteTower          | -0.0001                | 0.0041               | 0.0053               | -0.1469                | -0.0340              | 0.0682               |
| <b>Average</b>      | <b>0.0010</b>          | <b>0.0012</b>        | <b>0.0023</b>        | <b>0.0641</b>          | <b>0.0288</b>        | <b>0.0583</b>        |

**Supplementary Table S4**] Comparison of correlation coefficients between our algorithm and the Optics-based algorithm[42]

| Algorithm<br>Images | Our algorithm          |                      |                      | Optics-based algorithm |                      |                      |
|---------------------|------------------------|----------------------|----------------------|------------------------|----------------------|----------------------|
|                     | Horizontal correlation | Vertical correlation | Diagonal correlation | Horizontal correlation | Vertical correlation | Diagonal correlation |
| Buddha              | -0.0004                | 0.0009               | 0.0006               | 0.0145                 | 0.0290               | 0.0155               |
| Flower              | 0.0015                 | -0.00009             | -0.00001             | 0.0449                 | 0.0707               | 0.0487               |
| GreatWall           | -0.0016                | -0.00008             | 0.0007               | 0.0285                 | 0.0748               | 0.0278               |
| House               | -0.0004                | 0.0007               | -0.0035              | 0.0190                 | 0.0550               | 0.0214               |
| Lake1               | 0.0018                 | 0.0020               | 0.0013               | 0.0362                 | 0.0877               | 0.0345               |
| Lake2               | 0.0015                 | 0.0006               | 0.0021               | 0.0906                 | 0.1452               | 0.0918               |
| WhiteTower          | -0.0001                | 0.0041               | 0.0053               | 0.0250                 | 0.0673               | 0.0235               |
| <b>Average</b>      | <b>0.0010</b>          | <b>0.0012</b>        | <b>0.0023</b>        | <b>0.0370</b>          | <b>0.0757</b>        | <b>0.0376</b>        |

**Supplementary Table S5**] Comparison of correlation coefficients between our algorithm and the hash-based algorithm[43]

| Algorithm<br>Images | Our algorithm          |                      |                      | Hash-based algorithm   |                      |                      |
|---------------------|------------------------|----------------------|----------------------|------------------------|----------------------|----------------------|
|                     | Horizontal correlation | Vertical correlation | Diagonal correlation | Horizontal correlation | Vertical correlation | Diagonal correlation |
| Buddha              | -0.0004                | 0.0009               | 0.0006               | 0.0109                 | 0.0221               | 0.0044               |

|                |               |               |               |               |               |               |
|----------------|---------------|---------------|---------------|---------------|---------------|---------------|
| Flower         | 0.0015        | -0.00009      | -0.00001      | 0.0161        | 0.0276        | 0.0072        |
| GreatWall      | -0.0016       | -0.00008      | 0.0007        | 0.0145        | 0.0314        | 0.0096        |
| House          | -0.0004       | 0.0007        | -0.0035       | 0.0100        | 0.0278        | 0.0086        |
| Lake1          | 0.0018        | 0.0020        | 0.0013        | 0.0147        | 0.0381        | 0.0052        |
| Lake2          | 0.0015        | 0.0006        | 0.0021        | 0.0174        | 0.0352        | 0.0068        |
| WhiteTower     | -0.0001       | 0.0041        | 0.0053        | 0.0107        | 0.0276        | 0.0084        |
| <b>Average</b> | <b>0.0010</b> | <b>0.0012</b> | <b>0.0023</b> | <b>0.0135</b> | <b>0.0300</b> | <b>0.0072</b> |

**Supplementary Table S6** | Comparison of correlation coefficients between our algorithm and the quantum image encryption algorithm[44]

| Algorithm<br>Images | Our algorithm          |                      |                      | Quantum image encryption algorithm |                      |                      |
|---------------------|------------------------|----------------------|----------------------|------------------------------------|----------------------|----------------------|
|                     | Horizontal correlation | Vertical correlation | Diagonal correlation | Horizontal correlation             | Vertical correlation | Diagonal correlation |
| Buddha              | -0.0004                | 0.0009               | 0.0006               | -0.0005                            | -0.0006              | -0.0025              |
| Flower              | 0.0015                 | -0.00009             | -0.00001             | 0.0025                             | 0.0017               | 0.0032               |
| GreatWall           | -0.0016                | -0.00008             | 0.0007               | 0.0011                             | 0.0004               | -0.0049              |
| House               | -0.0004                | 0.0007               | -0.0035              | -0.0036                            | 0.0099               | 0.0026               |
| Lake1               | 0.0018                 | 0.0020               | 0.0013               | -0.0001                            | 0.0055               | -0.0018              |
| Lake2               | 0.0015                 | 0.0006               | 0.0021               | 0.0083                             | 0.0009               | 0.0084               |
| WhiteTower          | -0.0001                | 0.0041               | 0.0053               | 0.0009                             | -0.0052              | -0.0029              |
| <b>Average</b>      | <b>0.0010</b>          | <b>0.0012</b>        | <b>0.0023</b>        | <b>0.0024</b>                      | <b>0.0035</b>        | <b>0.0038</b>        |

**Supplementary Table S7** | Comparison of correlation coefficients between our algorithm and the QW-based algorithm[14]

| Algorithm<br>Images | Our algorithm          |                      |                      | QW-based algorithm     |                      |                      |
|---------------------|------------------------|----------------------|----------------------|------------------------|----------------------|----------------------|
|                     | Horizontal correlation | Vertical correlation | Diagonal correlation | Horizontal correlation | Vertical correlation | Diagonal correlation |
| Buddha              | -0.0004                | 0.0009               | 0.0006               | 0.0088                 | 0.0022               | 0.0020               |
| Flower              | 0.0015                 | -0.00009             | -0.00001             | -0.0022                | -0.0074              | 0.0224               |
| GreatWall           | -0.0016                | -0.00008             | 0.0007               | 0.0064                 | -0.0131              | -0.0072              |
| Lake1               | 0.0018                 | 0.0020               | 0.0013               | 0.0018                 | 0.0070               | -0.0179              |
| Lake2               | 0.0015                 | 0.0006               | 0.0021               | -0.0263                | 0.0036               | 0.0075               |
| WhiteTower          | -0.0001                | 0.0041               | 0.0053               | -0.0064                | 0.0249               | 0.0029               |
| <b>Average</b>      | <b>0.0010</b>          | <b>0.0012</b>        | <b>0.0023</b>        | <b>0.0081</b>          | <b>0.0098</b>        | <b>0.0087</b>        |

**Supplementary Table S8** | Comparison of correlation coefficients between our algorithm and the algorithm based on quantum logistic map[45]

| algorithm | Proposed algorithm |          |          | The quantum algorithm |          |          |
|-----------|--------------------|----------|----------|-----------------------|----------|----------|
|           | Horizontal         | Vertical | Diagonal | Horizontal            | Vertical | Diagonal |

|        |             |             |             |             |             |             |
|--------|-------------|-------------|-------------|-------------|-------------|-------------|
| images | correlation | correlation | correlation | correlation | correlation | correlation |
| Boat   | 0.0014      | -0.0016     | 0.0054      | 0.0065      | 0.0055      | 0.0082      |

**Supplementary Table S9**| Comparison of correlation coefficients between our algorithm and the algorithm [46]

| Algorithm<br>Images | Our algorithm          |                      |                      | Algorithm[46]          |                      |                      |
|---------------------|------------------------|----------------------|----------------------|------------------------|----------------------|----------------------|
|                     | Horizontal correlation | Vertical correlation | Diagonal correlation | Horizontal correlation | Vertical correlation | Diagonal correlation |
| Buddha              | -0.0004                | 0.0009               | 0.0006               | -0.0111                | -0.0163              | 0.0061               |
| Flower              | 0.0015                 | -0.00009             | -0.00001             | -0.0004                | 0.0083               | -0.00002             |
| GreatWall           | -0.0016                | -0.00008             | 0.0007               | 0.0060                 | 0.0156               | -0.0014              |
| House               | -0.0004                | 0.0007               | -0.0035              | 0.0085                 | 0.0130               | 0.0119               |
| Lake1               | 0.0018                 | 0.0020               | 0.0013               | -0.0032                | 0.0050               | -0.0069              |
| Lake2               | 0.0015                 | 0.0006               | 0.0021               | 0.0048                 | 0.0009               | 0.0066               |
| WhiteTower          | -0.0001                | 0.0041               | 0.0053               | -0.0071                | 0.0207               | 0.0064               |
| <b>Average</b>      | <b>0.0010</b>          | <b>0.0012</b>        | <b>0.0023</b>        | <b>0.0059</b>          | <b>0.0114</b>        | <b>0.0056</b>        |

**Supplementary Table S10**| Comparison of correlation coefficients between our algorithm and the algorithm [47]

| Algorithm<br>Images | Our algorithm          |                      |                      | Algorithm[47]          |                      |                      |
|---------------------|------------------------|----------------------|----------------------|------------------------|----------------------|----------------------|
|                     | Horizontal correlation | Vertical correlation | Diagonal correlation | Horizontal correlation | Vertical correlation | Diagonal correlation |
| Buddha              | -0.0004                | 0.0009               | 0.0006               | 0.0073                 | -0.0295              | -0.0100              |
| Flower              | 0.0015                 | -0.00009             | -0.00001             | 0.0018                 | -0.0689              | 0.0008               |
| GreatWall           | -0.0016                | -0.00008             | 0.0007               | 0.0067                 | -0.0645              | 0.0064               |
| House               | -0.0004                | 0.0007               | -0.0035              | 0.0030                 | -0.0733              | -0.0007              |
| Lake1               | 0.0018                 | 0.0020               | 0.0013               | -0.0003                | -0.0343              | 0.0093               |
| Lake2               | 0.0015                 | 0.0006               | 0.0021               | 0.0015                 | -0.0841              | 0.0053               |
| WhiteTower          | -0.0001                | 0.0041               | 0.0053               | 0.0070                 | -0.0624              | 0.0076               |
| <b>Average</b>      | <b>0.0010</b>          | <b>0.0012</b>        | <b>0.0023</b>        | <b>0.0039</b>          | <b>0.0596</b>        | <b>0.0057</b>        |

**Supplementary Table S11**| Results of NPCR and UACI by using our algorithm

| Images     | NPCR( $\times 100\%$ ) | UACI( $\times 100\%$ ) |
|------------|------------------------|------------------------|
| Buddha     | 99.60                  | 33.50                  |
| Flower     | 99.60                  | 33.48                  |
| GreatWall  | 99.62                  | 33.51                  |
| House      | 99.60                  | 33.44                  |
| Lake1      | 99.60                  | 33.36                  |
| Lake2      | 99.62                  | 33.46                  |
| WhiteTower | 99.62                  | 33.48                  |

|                |              |              |
|----------------|--------------|--------------|
| <b>Average</b> | <b>99.61</b> | <b>33.46</b> |
|----------------|--------------|--------------|

**Supplementary Table S12**| Comparison of NPCR and UACI between our algorithm and the algorithms[41,43]

| Algorithm                  | Average NPCR( $\times 100\%$ ) | Average UACI( $\times 100\%$ ) |
|----------------------------|--------------------------------|--------------------------------|
| Ours                       | 99.61                          | 33.46                          |
| Chaos-based algorithm [41] | 0.00004                        | 4.0605e-06                     |
| Hash-based algorithm [43]  | 0.00004                        | 1.4960e-06                     |

**Supplementary Table S13**| Comparison of NPCR by using our algorithm and the algorithm [46]

| Algorithm<br>Images | Our algorithm | Algorithm[46] |
|---------------------|---------------|---------------|
| Buddha              | 99.60         | 99.18         |
| Flower              | 99.60         | 99.17         |
| GreatWall           | 99.62         | 99.12         |
| House               | 99.60         | 99.01         |
| Lake1               | 99.60         | 99.17         |
| Lake2               | 99.62         | 99.17         |
| WhiteTower          | 99.62         | 99.13         |
| <b>Average</b>      | <b>99.61</b>  | <b>99.14</b>  |

**Supplementary Table S14**| Comparison of UACI by using our algorithm and the algorithm [46]

| Algorithm<br>Images | Our algorithm | Algorithm[46] |
|---------------------|---------------|---------------|
| Buddha              | 33.50         | 23.66         |
| Flower              | 33.48         | 24.53         |
| GreatWall           | 33.51         | 24.81         |
| House               | 33.44         | 22.17         |
| Lake1               | 33.36         | 22.96         |
| Lake2               | 33.46         | 24.83         |
| WhiteTower          | 33.48         | 22.99         |
| <b>Average</b>      | <b>33.46</b>  | <b>23.71</b>  |

**Supplementary Table S15**| Comparison of NPCR between our algorithm and the algorithm [47]

| Algorithm<br>Images | Our algorithm | Algorithm[47] |
|---------------------|---------------|---------------|
| Buddha              | 99.60         | 3.8147e-06    |

|                |              |            |
|----------------|--------------|------------|
| Flower         | 99.60        | 0          |
| GreatWall      | 99.62        | 0          |
| House          | 99.60        | 0          |
| Lake1          | 99.60        | 0          |
| Lake2          | 99.62        | 0          |
| WhiteTower     | 99.62        | 3.8147e-06 |
| <b>Average</b> | <b>99.61</b> | <b>0</b>   |

**Supplementary Table S16**| Comparison of UACI between our algorithm and the algorithm [47]

| Algorithm<br>Images | Our algorithm | Algorithm[47] |
|---------------------|---------------|---------------|
| Buddha              | 33.50         | 1.4960e-06    |
| Flower              | 33.48         | 0             |
| GreatWall           | 33.51         | 0             |
| House               | 33.44         | 0             |
| Lake1               | 33.36         | 0             |
| Lake2               | 33.46         | 0             |
| WhiteTower          | 33.48         | 1.4960e-06    |
| <b>Average</b>      | <b>33.46</b>  | <b>0</b>      |

**Supplementary Table S17**| Comparison of NPCR and UACI between our algorithm and the algorithm[45]

| algorithm         | NPCR( $\times 100\%$ ) | UACI( $\times 100\%$ ) |
|-------------------|------------------------|------------------------|
| Ours              | 0.996078               | 33.53                  |
| The algorithm[45] | 99.5896                | 33.20                  |

**Supplementary Table S18**| NPCR value in key sensitivity analysis

| Images         | NPCR between the encrypted images with different secret keys | NPCR between the decrypted images with correct key and the decrypted images with wrong key |
|----------------|--------------------------------------------------------------|--------------------------------------------------------------------------------------------|
| Buddha         | 99.62                                                        | 99.58                                                                                      |
| Flower         | 99.59                                                        | 99.61                                                                                      |
| GreatWall      | 99.61                                                        | 99.61                                                                                      |
| House          | 99.61                                                        | 99.61                                                                                      |
| Lake1          | 99.61                                                        | 99.61                                                                                      |
| Lake2          | 99.61                                                        | 99.59                                                                                      |
| WhiteTower     | 99.59                                                        | 99.59                                                                                      |
| <b>Average</b> | <b>99.61</b>                                                 | <b>99.60</b>                                                                               |

**Supplementary Table S19** Comparisons of average information entropy of cipher images between our algorithm and other algorithms

| Images         | Original image | Our algorithm   | Chaos-based algorithm | Hash-based algorithm |
|----------------|----------------|-----------------|-----------------------|----------------------|
| Buddha         | 7.357949       | 7.999175        | 7.437544              | 7.997775             |
| Flower         | 7.445506       | 7.999297        | 7.513925              | 7.994711             |
| GreatWall      | 7.571477       | 7.999304        | 7.852988              | 7.997933             |
| House          | 7.466426       | 7.999226        | 7.584169              | 7.998178             |
| Lake1          | 7.048217       | 7.999130        | 7.563206              | 7.991746             |
| Lake2          | 7.305189       | 7.999108        | 7.785397              | 7.986923             |
| WhiteTower     | 7.477779       | 7.999355        | 7.692131              | 7.997278             |
| <b>Average</b> | 7.381792       | <b>7.999228</b> | <b>7.632765</b>       | <b>7.994934</b>      |

**Supplementary Table S20** Comparisons of the information entropy of cipher images between our algorithm and the image algorithm based on quantum logistic map[45]

| image | Our algorithm | The image algorithm based on quantum logistic map |
|-------|---------------|---------------------------------------------------|
| Boat  | 7.997         | 7.999                                             |

**Supplementary Table S21** Results of NIST SP800-22 for Buddha's cipher image

| Test name                                    | P-value  | result  |
|----------------------------------------------|----------|---------|
| Approximate entropy test(block = 10)         | 0.931323 | SUCCESS |
| Block frequency test(block = 128)            | 0.566149 | SUCCESS |
| Cumulative sums(forward) test                | 0.141837 | SUCCESS |
| Cumulative sums (reverse) test               | 0.091001 | SUCCESS |
| Spectral DFT test                            | 0.102376 | SUCCESS |
| Frequency test                               | 0.846176 | SUCCESS |
| Linear complexity(block = 500)               | 0.539419 | SUCCESS |
| Longest runs of ones test                    | 0.939260 | SUCCESS |
| Non-Overlapping templates                    |          |         |
| test(m=9,template= 00000011)                 | 0.984629 | SUCCESS |
| Overlapping template of all ones test(m = 9) | 0.033341 | SUCCESS |
| Random excursions test(x=-1)                 | 0.766784 | SUCCESS |
| Random excursions variant test(x=+1)         | 0.857714 | SUCCESS |
| Rank test                                    | 0.255072 | SUCCESS |
| Runs test                                    | 0.642675 | SUCCESS |
| Serial test1(block = 16)                     | 0.382733 | SUCCESS |
| Serial test2(block = 16)                     | 0.457034 | SUCCESS |
| Universal statistical test(block = 7)        | 0.135122 | SUCCESS |
